# Supplementary material
Source: publisher site journal article supplement (https://www.dovepress.com/article/354095)
Supplement: Supplementary file 1 [file get_supplementary_file.php]

## **Supplementary materials**

**Supplementary Table 1.** Sequences of the primers and TaqMan<sup>®</sup> probes

| <b>Gene (GenBank accession)</b> | <b>Oligonucleotide sequence (5'-3')</b> |
|---------------------------------|-----------------------------------------|
| <i>CCL2</i> (NM_002982)         |                                         |
| Forward                         | GCTCATAGCAGCCACCTTCATT                  |
| Reverse                         | TCTGCACTGAGATCTTCCTATTGGT               |
| TaqMan <sup>®</sup> Probe       | FAM-TCGCTCAGCCAGATGCAATCAATGC-TAMRA     |
| <i>CD68</i> (NM_001251)         |                                         |
| Forward                         | CACGCAGCACAGTGGACATT                    |
| Reverse                         | CGAGTTGCTGCAACTGAAGCT                   |
| TaqMan <sup>®</sup> Probe       | FAM-TCGGCTCAGAATGCATCCCTTCGA-TAMRA      |
| <i>IL1RN</i> (NM_173842)        |                                         |
| Forward                         | CCAGCTGGAGGCAGTTAACATC                  |
| Reverse                         | GCAGGCGGCAGACTCAA                       |
| TaqMan <sup>®</sup> Probe       | FAM-CGCCTTCATCCGCTCAGACAGTGG-TAMRA      |
| <i>MMP9</i> (NM_004994)         |                                         |
| Forward                         | GCCCGGACCAAGGATACAGT                    |
| Reverse                         | CCCCTCAGTGAAGCGGTACA                    |
| TaqMan <sup>®</sup> Probe       | FAM-ACGCGCTGGGCTTAGATCATTCTCA-TAMRA     |
| <i>SPP1</i> (NM_000582)         |                                         |
| Forward                         | CATCCAGTACCCTGATGCTACAGA                |
| Reverse                         | GGCCTTGATGCACCATTCAA                    |
| TaqMan <sup>®</sup> Probe       | FAM-ACATCACCTCACACATGGAAAGCGAGGA-TAMRA  |
| <i>TNF</i> (NM_00594)           |                                         |
| Forward                         | CCCCAGGGACCTCTCTAATC                    |
| Reverse                         | ACATGGGCTACAGGCTTGTC                    |
| TaqMan <sup>®</sup> Probe       | FAM-CCTCTGGCCAGGCAGTCAGATCAT-TAMRA      |
| <i>VEGFA</i> (NM_004994)        |                                         |
| Forward                         | CAGCACAACAAATGTGAATGCA                  |
| Reverse                         | CAAATGCTTTCTCCGCTCTGA                   |
| TaqMan <sup>®</sup> Probe       | FAM-AGCAAGACAAGAAAACCCTGTGGGCC-TAMRA    |

*CCL2*, C-C motif chemokine ligand 2 (MCP-1); *CD68*, CD68 molecule; *IL1RN*, interleukin-1 receptor antagonist; *MMP9*, matrix metalloproteinase 9; *SPP1*, secreted phosphoprotein 1 (osteopontin); *TNF*, tumor necrosis factor, *VEGFA*, vascular endothelial growth factor A.

**Supplementary Table 2.** Bivariate analysis of the correlation between IL-1RA and other variables, unadjusted and after adjusting for body fat

| Variable            | Serum IL-1RA           |                  |                      |                  |
|---------------------|------------------------|------------------|----------------------|------------------|
|                     | Unadjusted correlation |                  | Adjusted correlation |                  |
|                     | <i>r</i>               | <i>P</i> value   | <i>r</i>             | <i>P</i> value   |
| Sex                 | -0.01                  | 0.861            | -0.20                | <b>0.012</b>     |
| Age                 | -0.07                  | 0.422            | -0.14                | 0.091            |
| BMI                 | 0.51                   | <b>&lt;0.001</b> | 0.32                 | <b>&lt;0.001</b> |
| Body fat percentage | 0.42                   | <b>&lt;0.001</b> | —                    | —                |
| WC                  | 0.50                   | <b>&lt;0.001</b> | 0.33                 | <b>&lt;0.001</b> |
| SBP                 | 0.16                   | <b>0.044</b>     | 0.01                 | 0.983            |
| DBP                 | 0.20                   | <b>0.014</b>     | 0.04                 | 0.665            |
| Glucose             | 0.14                   | 0.087            | 0.03                 | 0.705            |
| Insulin             | 0.31                   | <b>&lt;0.001</b> | 0.20                 | <b>0.014</b>     |
| HOMA                | 0.30                   | <b>&lt;0.001</b> | 0.19                 | <b>0.018</b>     |
| QUICKI              | -0.37                  | <b>&lt;0.001</b> | -0.21                | <b>0.011</b>     |
| Triglycerides       | 0.13                   | 0.115            | 0.08                 | 0.306            |
| Cholesterol         | 0.20                   | <b>0.013</b>     | 0.09                 | 0.244            |
| LDL-cholesterol     | 0.25                   | <b>0.002</b>     | 0.16                 | 0.052            |
| HDL-cholesterol     | -0.27                  | <b>&lt;0.001</b> | -0.25                | <b>0.002</b>     |
| Uric acid           | 0.33                   | <b>&lt;0.001</b> | 0.26                 | <b>0.001</b>     |
| Fibrinogen          | 0.33                   | <b>&lt;0.001</b> | 0.28                 | <b>&lt;0.001</b> |
| vWF                 | 0.17                   | <b>0.045</b>     | 0.07                 | 0.448            |
| Homocysteine        | 0.14                   | 0.101            | 0.14                 | 0.104            |
| CRP                 | 0.49                   | <b>&lt;0.001</b> | 0.33                 | <b>&lt;0.001</b> |
| WBC                 | 0.55                   | <b>&lt;0.001</b> | 0.47                 | <b>&lt;0.001</b> |
| ALT                 | 0.05                   | 0.545            | 0.16                 | <b>0.049</b>     |
| AST                 | -0.07                  | 0.387            | 0.09                 | 0.257            |
| AST/ALT ratio       | -0.17                  | <b>0.033</b>     | -0.15                | 0.067            |
| γ-GT                | 0.23                   | <b>0.004</b>     | 0.23                 | <b>0.004</b>     |
| Creatinine          | 0.02                   | 0.800            | 0.14                 | 0.098            |
| SAA                 | 0.35                   | <b>&lt;0.001</b> | 0.18                 | <b>0.048</b>     |
| Endotoxin           | 0.14                   | 0.124            | 0.05                 | 0.619            |
| Osteopontin         | 0.24                   | <b>0.005</b>     | 0.26                 | <b>0.004</b>     |
| VAI                 | 0.18                   | <b>0.023</b>     | 0.11                 | 0.178            |
| TyG index           | 0.28                   | <b>&lt;0.001</b> | 0.17                 | <b>0.038</b>     |
| FLI                 | 0.45                   | <b>&lt;0.001</b> | 0.24                 | <b>0.002</b>     |
| Adiponectin         | -0.46                  | <b>&lt;0.001</b> | -0.46                | <b>&lt;0.001</b> |
| Leptin              | 0.31                   | <b>&lt;0.001</b> | -0.02                | 0.806            |
| Adpn/Lep ratio      | -0.33                  | <b>&lt;0.001</b> | -0.10                | 0.243            |

BMI, body mass index; WC, waist circumference; SBP, systolic blood pressure; DBP, diastolic blood pressure; HOMA, homeostatic model assessment; QUICKI, quantitative insulin sensitivity check index; vWF, von Willebrand factor; CRP, C-reactive protein; ALT, alanine aminotransferase; WBC, white blood cells; AST, aspartate aminotransferase; γ-GT, γ-glutamyltransferase; SAA, serum amyloid A; VAI, visceral adipose index; TyG index, triglyceride glucose index; FLI, fatty liver index. Values are Pearson's correlation coefficients (*r*) and associated *P* values. *P* values lower than 0.05 are highlighted in bold.

**Supplementary Table 3.** Characteristics of individuals with normal weight or obesity included in the adipose tissue expression study

|                          | NW          | OB-NG        | OB-IGT&T2D    | <i>P</i> |
|--------------------------|-------------|--------------|---------------|----------|
| n                        | 7           | 10           | 19            |          |
| Sex, m/f                 | 1/6         | 1/6          | 0/19          | 0.285    |
| Age, y                   | 54 ± 18     | 35 ± 10*     | 51 ± 9†       | 0.001    |
| BMI, kg/m <sup>2</sup>   | 22.5 ± 2.4  | 45.8 ± 6.9*  | 43.2 ± 6.5*   | <0.001   |
| Glucose, mg/dL           | 89 ± 10     | 92 ± 11      | 120 ± 35†     | 0.035    |
| 2h OGTT Glucose, mg/dL   |             | 117 ± 17     | 207 ± 75†     | 0.002    |
| Insulin, µU/mL           | 6.7 ± 1.6   | 16.8 ± 11.3  | 22.2 ± 13.7   | 0.150    |
| HOMA                     | 1.4 ± 0.3   | 4.0 ± 3.1    | 7.1 ± 7.1     | 0.228    |
| QUICKI                   | 0.36 ± 0.01 | 0.33 ± 0.03  | 0.30 ± 0.03*  | 0.012    |
| Triglycerides, mg/dL     | 69 ± 27     | 110 ± 26     | 117 ± 54      | 0.168    |
| HDL-cholest, mg/dL       | 61 ± 8      | 43 ± 7*      | 50 ± 10*      | 0.005    |
| CRP, mg/L                | 2.0 ± 1.0   | 14.7 ± 22.7* | 16.0 ± 17.2*  | 0.026    |
| AST/ALT                  | 1.13 ± 0.20 | 0.67 ± 0.21* | 0.67 ± 0.16*  | 0.002    |
| Leptin, ng/mL            | 8.4 ± 4.5   | 66.9 ± 21.4* | 70.0 ± 21.2*  | <0.001   |
| <i>SPP1</i> mRNA, a. u.  | 1.0 ± 0.8   | 3.6 ± 2.5    | 8.9 ± 4.6*†   | <0.001   |
| <i>TNF</i> mRNA, a. u.   | 1.0 ± 1.5   | 3.1 ± 2.1    | 3.9 ± 2.5     | 0.073    |
| <i>CCL2</i> mRNA, a. u.  | 1.0 ± 0.8   | 2.6 ± 2.4    | 3.9 ± 2.9     | 0.101    |
| <i>CD68</i> mRNA, a. u.  | 1.0 ± 1.2   | 3.0 ± 1.9    | 3.8 ± 2.2*    | 0.028    |
| <i>MMP9</i> mRNA, a. u.  | 1.0 ± 0.7   | 12.7 ± 12.2  | 31.0 ± 22.1*† | 0.004    |
| <i>VEGFA</i> mRNA, a. u. | 1.0 ± 0.8   | 1.0 ± 0.5    | 1.1 ± 0.5     | 0.868    |

NW, normal weight; OB, obesity; NG, normoglycemia; IGT, impaired glucose tolerance; T2D, type 2 diabetes; BMI, body mass index; OGTT, oral glucose tolerance test; HOMA, homeostatic model assessment; QUICKI, quantitative insulin sensitivity check index; CRP, C-reactive protein; AST, aspartate aminotransferase; ALT, alanine aminotransferase; *SPP1*, secreted phosphoprotein 1 (osteopontin); a. u. arbitrary units; TNF, tumor necrosis factor, *CCL2*, C-C motif chemokine ligand 2 (MCP-1); *CD68*, CD68 molecule; *MMP9*, matrix metalloproteinase 9; *VEGFA*, vascular endothelial growth factor A. Data presented as mean ± SD. mRNA expression in visceral adipose tissue is expressed as the ratio to *18S* rRNA. The expression in NW subjects was assumed to be 1. Differences between groups were analyzed by ANOVA followed by LSD tests. \* *P* < 0.05 vs NW. †*P* < 0.05 vs OB-NG.

**Supplementary Table 4.** Effect of weight gain

|                               | Before WG     | After WG      | P      |
|-------------------------------|---------------|---------------|--------|
| Sex, male/female              | 5/15          | —             | —      |
| Age, y                        | 45.2 ± 15.6   | 46.7 ± 15.6   | —      |
| Body weight, kg               | 78.0 ± 18.9   | 83.3 ± 19.2   | <0.001 |
| BMI, kg/m <sup>2</sup>        | 29.4 ± 5.4    | 32.3 ± 6.3    | <0.001 |
| Body fat, %                   | 38.1 ± 7.8    | 42.3 ± 6.9    | <0.001 |
| WC, cm                        | 96 ± 15       | 100 ± 16      | 0.004  |
| SBP, mm Hg                    | 116 ± 14      | 113 ± 16      | 0.490  |
| DBP, mm Hg                    | 71 ± 10       | 70 ± 9        | 0.449  |
| Glucose, mg/mL                | 94 ± 11       | 99 ± 15       | 0.052  |
| Insulin, μU/mL                | 5.0 ± 3.6     | 4.7 ± 5.4     | 0.716  |
| HOMA                          | 1.2 ± 0.8     | 1.1 ± 1.3     | 0.834  |
| QUICKI                        | 0.390 ± 0.040 | 0.404 ± 0.044 | 0.267  |
| Triglycerides, mg/dL          | 78 ± 21       | 85 ± 36       | 0.292  |
| Total-cholesterol, mg/dL      | 153 ± 34      | 168 ± 37      | 0.014  |
| LDL-cholesterol, mg/dL        | 80 ± 35       | 87 ± 40       | 0.185  |
| HDL-cholesterol, mg/dL        | 57 ± 19       | 64 ± 16       | 0.003  |
| Uric acid, mg/dL              | 4.0 ± 0.9     | 4.3 ± 1.0     | 0.105  |
| Homocysteine, μmol/L          | 7.1 ± 1.7     | 7.9 ± 3.3     | 0.253  |
| CRP, mg/L                     | 1.0 ± 0.6     | 1.0 ± 0.8     | 0.924  |
| WBC, 10 <sup>6</sup> cells/mL | 5.6 ± 1.1     | 5.6 ± 0.9     | 0.895  |
| ALT, IU/L                     | 24 ± 14       | 15 ± 6        | 0.036  |
| AST, IU/L                     | 10 ± 8        | 15 ± 4        | 0.049  |
| AST/ALT ratio                 | 0.88 ± 0.23   | 1.08 ± 0.35   | 0.021  |
| γ-GT, IU/L                    | 13 ± 11       | 13 ± 12       | 0.898  |
| VAI                           | 1.19 ± 0.65   | 1.13 ± 0.70   | 0.557  |
| TyG index                     | 8.14 ± 0.33   | 8.20 ± 0.47   | 0.506  |
| FLI                           | 83.3 ± 6.4    | 84.5 ± 6.3    | 0.235  |
| Leptin, ng/mL                 | 19.3 ± 18.4   | 26.5 ± 17.6   | 0.003  |
| Adiponectin, μg/mL            | 16.8 ± 6.4    | 17.4 ± 7.4    | 0.570  |
| Adpn/Lep ratio                | 2.3 ± 2.3     | 1.2 ± 1.2     | 0.001  |

WG, weight gain; BMI, body mass index; WC, waist circumference; SBP, systolic blood pressure; DBP, diastolic blood pressure; HOMA, homeostasis model assessment; QUICKI, quantitative insulin sensitivity check index; CRP, C-reactive protein; WBC, white blood cells; ALT, alanine aminotransferase; AST, aspartate aminotransferase; γ-GT, γ-glutamyltransferase. Data presented as mean ± SD. Differences between after vs before weight gain (WG) were computed by two-tailed paired Student's *t* tests.

**Supplementary Table 5.** Effect of weight loss in patients with obesity after conventional dietary treatment or RYGB

|                               | <i>Conventional dietary treatment</i> |               |        | <i>RYGB</i>   |               |        |
|-------------------------------|---------------------------------------|---------------|--------|---------------|---------------|--------|
|                               | Before WL                             | After WL      | P      | Before WL     | After WL      | P      |
| Sex, male/female              | 9/7                                   | —             | —      | 22/41         | —             | —      |
| Age, y                        | 40.5 ± 16.4                           | 41.3 ± 16.2   | —      | 47.2 ± 10.8   | 47.9 ± 10.8   | —      |
| Body weight, kg               | 95 ± 18                               | 81 ± 15       | <0.001 | 118 ± 21      | 81 ± 15       | <0.001 |
| BMI, kg/m <sup>2</sup>        | 32.8 ± 5.1                            | 28.1 ± 3.5    | <0.001 | 42.5 ± 5.7    | 29.1 ± 4.3    | <0.001 |
| Body fat, %                   | 42.1 ± 7.1                            | 33.9 ± 6.2    | <0.001 | 51.9 ± 6.5    | 35.2 ± 9.8    | <0.001 |
| WC, cm                        | 107 ± 13                              | 95 ± 11       | <0.001 | 124 ± 12      | 96 ± 13       | <0.001 |
| SBP, mm Hg                    | 123 ± 13                              | 115 ± 11      | 0.028  | 132 ± 17      | 117 ± 13      | <0.001 |
| DBP, mm Hg                    | 77 ± 10                               | 71 ± 7        | 0.011  | 84 ± 11       | 71 ± 8        | <0.001 |
| Glucose, mg/mL                | 94 ± 14                               | 94 ± 13       | 0.930  | 102 ± 23      | 87 ± 13       | <0.001 |
| Insulin, μU/mL                | 16.4 ± 7.4                            | 12.7 ± 5.9    | 0.171  | 19.9 ± 11.7   | 6.5 ± 3.8     | <0.001 |
| HOMA                          | 3.9 ± 2.1                             | 3.1 ± 1.9     | 0.190  | 5.2 ± 3.8     | 1.4 ± 0.8     | <0.001 |
| QUICKI                        | 0.319 ± 0.023                         | 0.335 ± 0.039 | 0.208  | 0.316 ± 0.036 | 0.382 ± 0.047 | <0.001 |
| Triglycerides, mg/dL          | 112 ± 49                              | 84 ± 33       | 0.023  | 123 ± 50      | 71 ± 14       | <0.001 |
| Total-cholesterol, mg/dL      | 184 ± 30                              | 168 ± 22      | 0.064  | 194 ± 35      | 160 ± 36      | <0.001 |
| LDL-cholesterol, mg/dL        | 114 ± 38                              | 102 ± 23      | 0.188  | 117 ± 30      | 88 ± 24       | <0.001 |
| HDL-cholesterol, mg/dL        | 47 ± 14                               | 50 ± 11       | 0.551  | 50 ± 13       | 54 ± 13       | 0.046  |
| Uric acid, mg/dL              | 5.5 ± 0.9                             | 5.0 ± 0.8     | 0.064  | 5.6 ± 1.4     | 4.4 ± 1.0     | <0.001 |
| CRP, mg/L                     |                                       |               |        | 11.6 ± 12.8   | 2.6 ± 6.7     | <0.001 |
| WBC, 10 <sup>6</sup> cells/mL | 7.1 ± 1.7                             | 6.8 ± 1.5     | 0.536  | 7.4 ± 2.2     | 6.0 ± 1.5     | <0.001 |
| ALT, IU/L                     | 28 ± 22                               | 19 ± 12       | 0.057  | 26 ± 15       | 28 ± 19       | 0.557  |
| AST, IU/L                     | 15 ± 7                                | 13 ± 3        | 0.146  | 19 ± 8        | 25 ± 18       | 0.013  |

|                    |             |             |       |             |             |        |
|--------------------|-------------|-------------|-------|-------------|-------------|--------|
| AST/ALT ratio      | 0.68 ± 0.24 | 0.83 ± 0.32 | 0.099 | 0.81 ± 0.25 | 0.98 ± 0.28 | 0.019  |
| γ-GT, IU/L         | 19 ± 11     | 18 ± 22     | 0.856 | 29 ± 36     | 23 ± 43     | 0.184  |
| VAI                | 1.71 ± 0.87 | 1.29 ± 0.66 | 0.024 | 2.08 ± 1.87 | 1.03 ± 0.39 | <0.001 |
| TyG index          | 8.49 ± 0.43 | 8.20 ± 0.43 | 0.011 | 8.63 ± 0.40 | 8.01 ± 0.25 | <0.001 |
| FLI                | 89.7 ± 1.6  | 86.5 ± 3.5  | 0.016 | 91.8 ± 1.0  | 85.3 ± 3.8  | <0.001 |
| Leptin, ng/mL      | 26.2 ± 16.2 | 13.5 ± 7.4  | 0.003 | 45.1 ± 23.8 | 12.7 ± 11.6 | <0.001 |
| Adiponectin, μg/mL | 9.8 ± 5.9   | 11.3 ± 7.6  | 0.215 | 10.7 ± 5.6  | 18.3 ± 7.8  | <0.001 |
| Adpn/Lep ratio     | 0.5 ± 0.3   | 1.5 ± 2.0   | 0.049 | 0.3 ± 0.2   | 3.6 ± 5.8   | <0.001 |

RYGB, Roux-en-Y gastric bypass; WL, weight loss; BMI, body mass index; WC, waist circumference; SBP, systolic blood pressure; DBP, diastolic blood pressure; HOMA, homeostatic model assessment; QUICKI, quantitative insulin sensitivity check index; CRP, C-reactive protein; WBC, white blood cells; ALT, alanine aminotransferase; AST, aspartate aminotransferase; γ-GT, γ-glutamyltransferase. Data presented as mean ± SD. Differences between after vs before WL were computed by two-tailed paired Student's *t* tests.
